# Supplementary material
Source: HighWire-hosted journal article supplement (doi:10.1101/rna.028506.111)
Supplement: SuppTableLegends.docx [file SuppTableLegends.docx]

**Table S1.** List of Slf1p and Sro9p RNA targets.Columns indicate the following - Oligo Id SMD: SMD feature name on array; avg: average enrichment (log2 ratio) in three RIPs; P-value (t-test); S1/S9 tar: Slf1p or Sro9p target; Cu/Ox.: Copper and oxidative stress -related genes (see Table S2).

**Table S2.** List of genes implicated in copper homeostasis and /or response to oxidative stress. The list contains 101 genes that were compiled by downloading all genes affiliated with the GO terms “copper ion binding, response to copper ion, cellular copper ion homeostasis, copper ion import, copper ion transport, cellular response to oxidative stress” and “pentose-phosphate shunt, oxidative branch".

**Table S3.** List of transcripts with average upregulation > 1.5 fold after 24 h of *SLF1* overexpression. Oligo SMD: SMD feature name on array; avg: average log2 ratios; S1/S9 tar: Slf1p or Sro9p target; Cu/Ox.: Copper and oxidative stress -related genes (see Table S2).

**Table S4.** List oftranscripts with average down-regulation > 1.5 fold after 24 h of *SLF1* overexpression; Oligo SMD: feature name on array; avg: average log2 ratio; S1/S9 tar: Slf1p or Sro9p target; Cu/Ox.: Copper and oxidative stress -related genes (see Table S2).
